# Supplementary material for: Anterograde monosynaptic transneuronal tracers derived from herpes simplex virus 1 strain H129
Source: PubMed Central journal article supplement (PMC5427628; doi:10.1186/s13024-017-0179-7), 2017-05-12
Supplement: 13024_2017_179_MOESM1_ESM.pdf [file 13024_2017_179_MOESM1_ESM.pdf]

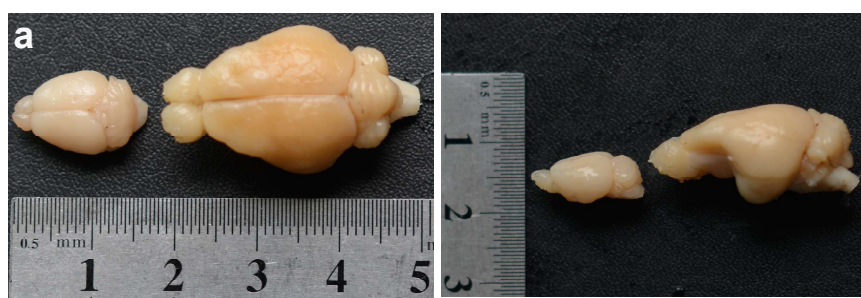

| Brain      | Size (mm) |          |          | Weight (g) |
|------------|-----------|----------|----------|------------|
|            | Length    | Width    | Height   |            |
| mouse      | 14.8±0.6  | 10.1±0.5 | 6.7±0.4  | 0.5 ± 0.1  |
| Tree shrew | 26.3±0.4  | 16.7±0.8 | 12.5±0.3 | 2.8 ± 0.1  |

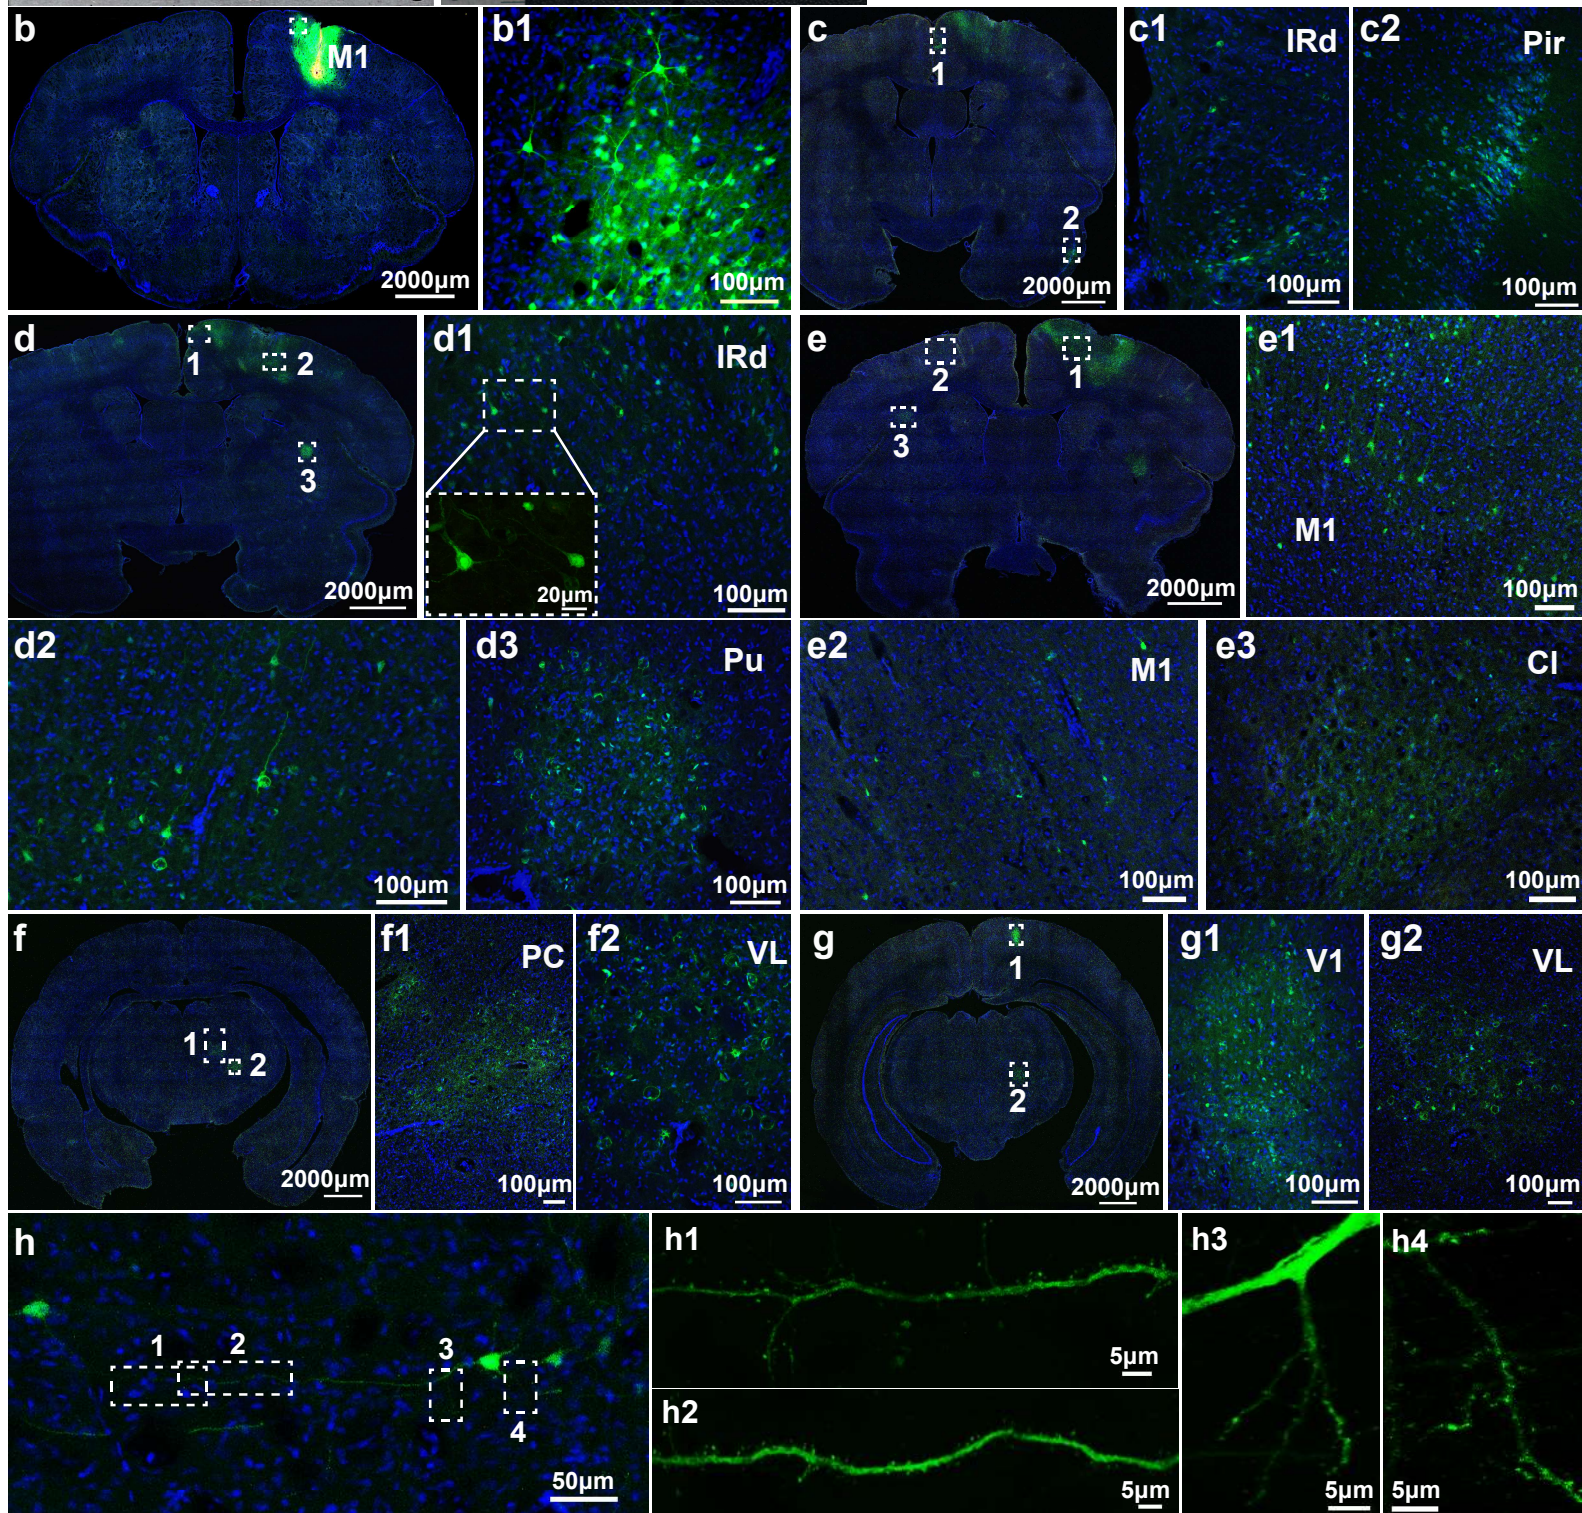

Supplementary Figure 1
