# Supplementary material for: Anterograde monosynaptic transneuronal tracers derived from herpes simplex virus 1 strain H129
Source: PubMed Central journal article supplement (PMC5427628; doi:10.1186/s13024-017-0179-7), 2017-05-12

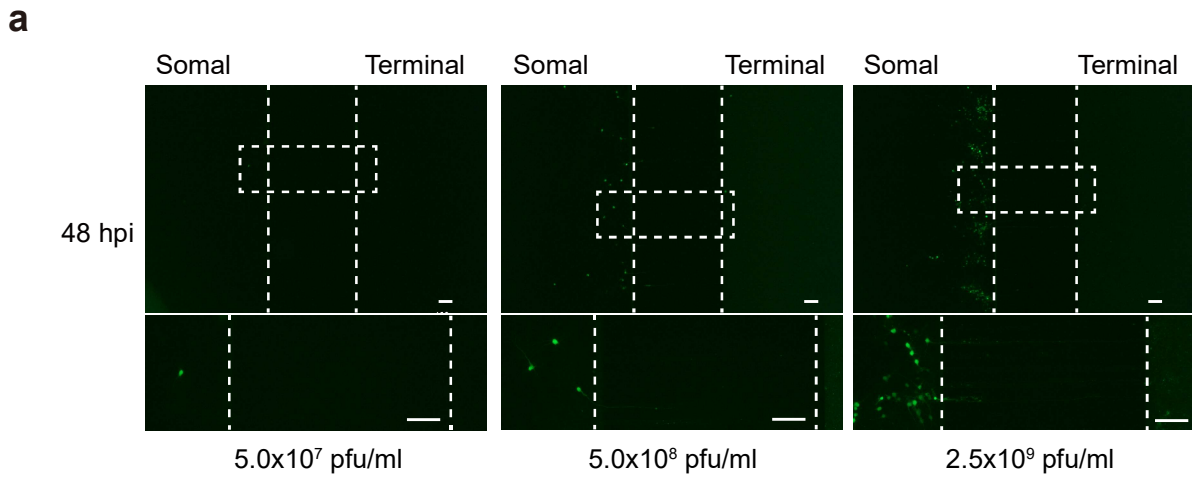

**b** Terminal invasion in different conditions

| Neuron type                                          | Virus concentration (pfu/ml) | Labelled neuron amount |             |             |
|------------------------------------------------------|------------------------------|------------------------|-------------|-------------|
|                                                      |                              | 24 hpi                 | 48 hpi      | 72 hpi      |
| Hipp. and cortical neuron<br>5x10 <sup>5</sup> cells | 1.0x10 <sup>7</sup>          | 0                      | 0           | 0           |
|                                                      | 5.0x10 <sup>7</sup>          | 0                      | 0.3 ± 0.5   | 0.3 ± 0.5   |
|                                                      | 5.0x10 <sup>8</sup>          | 0                      | 1.3 ± 1.2   | 1.3 ± 1.2   |
|                                                      | 2.5x10 <sup>9</sup>          | 6.7 ± 4.5              | 72.0 ± 8.0  | 89.0 ± 12.0 |
| Trigeminal ganglion<br>1x10 <sup>5</sup> cells       | 1.0x10 <sup>7</sup>          | 0                      | 0           | 0           |
|                                                      | 5.0x10 <sup>7</sup>          | 0                      | 4.3 ± 1.7   | 4.3 ± 1.7   |
|                                                      | 5.0x10 <sup>8</sup>          | 5.0 ± 3.6              | 9.7 ± 2.1   | 16.0 ± 3.6  |
|                                                      | 2.5x10 <sup>9</sup>          | 10.7 ± 6.6             | 44.0 ± 7.0  | 97.3 ± 26.0 |
| Dorsal root ganglion<br>1x10 <sup>5</sup> cells      | 1.0x10 <sup>7</sup>          | 0                      | 0           | 0           |
|                                                      | 5.0x10 <sup>7</sup>          | 0                      | 4.7 ± 3.7   | 6.0 ± 2.2   |
|                                                      | 5.0x10 <sup>8</sup>          | 1.0 ± 1.4              | 8.0 ± 5.1   | 9.3 ± 5.0   |
|                                                      | 2.5x10 <sup>9</sup>          | 26.7 ± 11.3            | 51.0 ± 13.1 | 75.3 ± 15.1 |

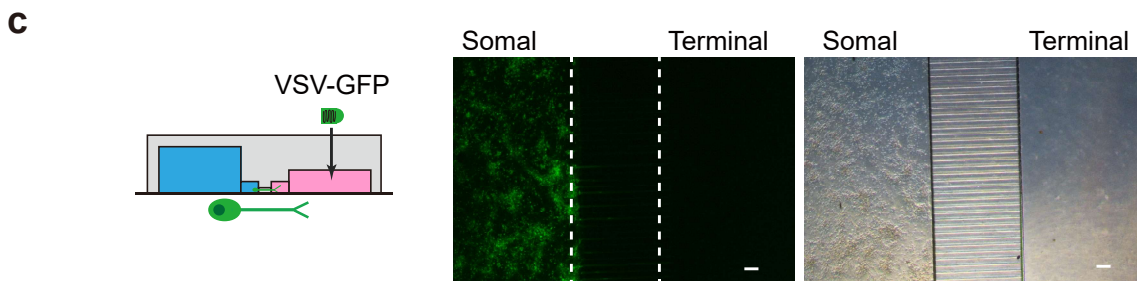

Supplement: 13024_2017_179_MOESM3_ESM.pdf [file 13024_2017_179_MOESM3_ESM.pdf]
