# Supplementary material for: Anterograde monosynaptic transneuronal tracers derived from herpes simplex virus 1 strain H129
Source: PubMed Central journal article supplement (PMC5427628; doi:10.1186/s13024-017-0179-7), 2017-05-12
Supplement: 13024_2017_179_MOESM7_ESM.pdf [file 13024_2017_179_MOESM7_ESM.pdf]

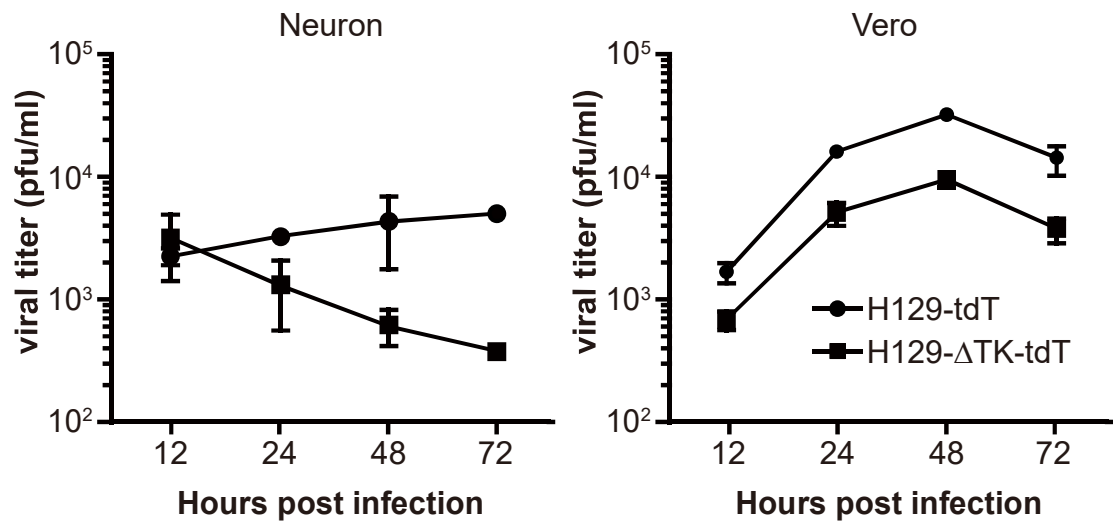

Supplementary Figure 7
