# Supplementary material for: Anterograde monosynaptic transneuronal tracers derived from herpes simplex virus 1 strain H129
Source: Springer Nature journal article supplement (doi:10.1186/s13024-017-0179-7), 2017-05-12
Supplement: MOESM2 [file 12281230]

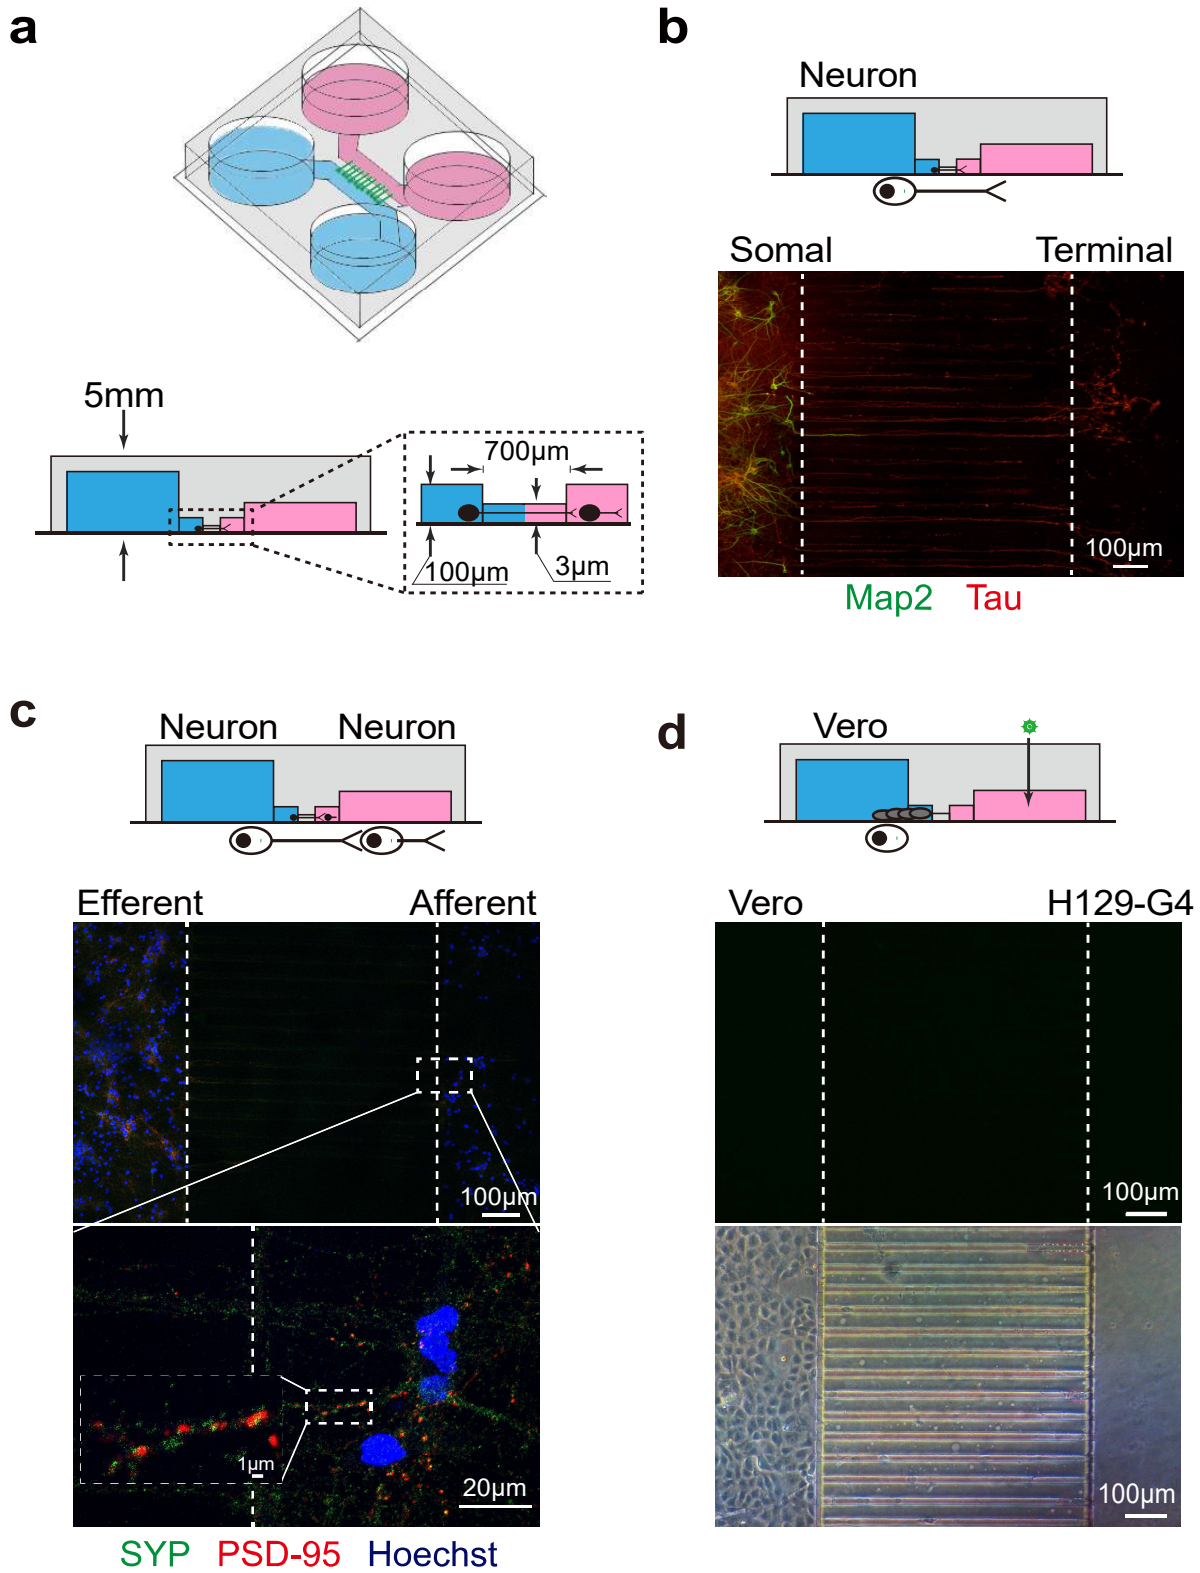

Supplementary Figure 2
