# Supplementary material for: Anterograde monosynaptic transneuronal tracers derived from herpes simplex virus 1 strain H129
Source: Springer Nature journal article supplement (doi:10.1186/s13024-017-0179-7), 2017-05-12
Supplement: MOESM8 [file 12281230]

a

H129- $\Delta$ TK-tdT alone in various brain regions

| Nucleus | Coordinates (mm) |       |       | H129- $\Delta$ TK-tdT |                   | Animal amount |
|---------|------------------|-------|-------|-----------------------|-------------------|---------------|
|         | ML               | AP    | DV    | Dose (pfu)            | volume ( $\mu$ l) |               |
| OB      | -0.48            | +4.28 | -2.30 | $1.75 \times 10^5$    | 0.35              | 3             |
| M1      | -1.70            | +1.54 | -1.75 | $1.0 \times 10^5$     | 0.2               | 3             |
| DG      | -1.25            | -2.06 | -2.00 | $7.5 \times 10^4$     | 0.15              | 3             |
| CA1     | -1.30            | -2.18 | -1.50 | $1.0 \times 10^5$     | 0.2               | 3             |
| LGN     | -2.13            | -2.30 | -2.75 | $1.0 \times 10^5$     | 0.2               | 3             |
| VTA     | -0.40            | -3.28 | -4.30 | $1.0 \times 10^5$     | 0.2               | 3             |

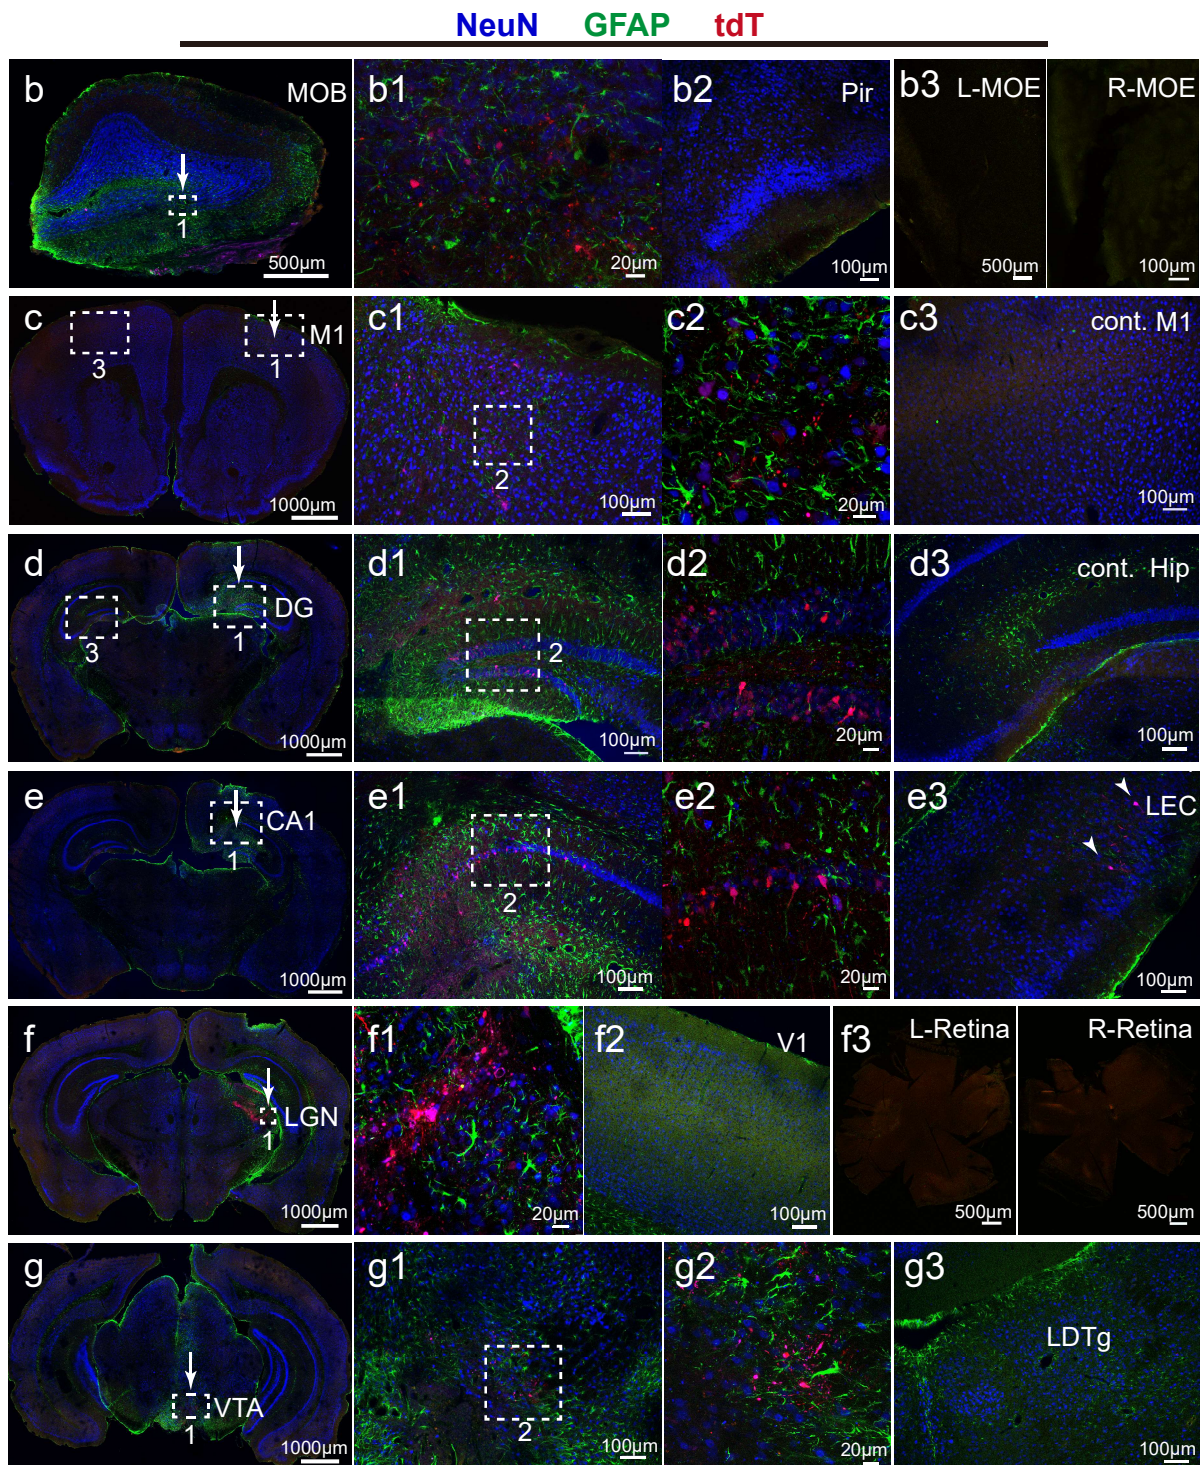

Supplementary Figure 8
